# Supplementary material for: A new usage of functionalized oligodeoxynucleotide probe for site-specific modification of a guanine base within RNA
Source: PubMed Central journal article supplement — Nucleic Acids Res. 2010 Jan 31;38(5):1760–6. doi: 10.1093/nar/gkp930 (PMC2836579; doi:10.1093/nar/gkp930), 2010-01-31
Supplement: gkp930_1.pdf [file gkp930_1.pdf]

## Supplementary Data

### A New Usage of Functionalized Oligodeoxynucleotide Probe for Site-Specific Modification of a Guanine Base within RNA

Kazumitsu Onizuka, Yosuke Taniguchi, Shigeki Sasaki,\*

Graduate School of Pharmaceutical Sciences, Kyushu University, 3-1-1 Maidashi,  
Higashi-ku, Fukuoka 812-8582, Japan, and CREST, Japan Science and  
Technology Agency.

sasaki@phar.kyushu-u.ac.jp

5'-d ( CTTT~~X~~TTCTCCTTTCT )  
3'-r ( GAAA~~Y~~AAGAGGAAAGA )

5'-d ( CTTT~~X~~TTCTCCTTTCT )  
3'-d ( GAAA~~Y~~AAGAGGAAAGA )

## CD spectra

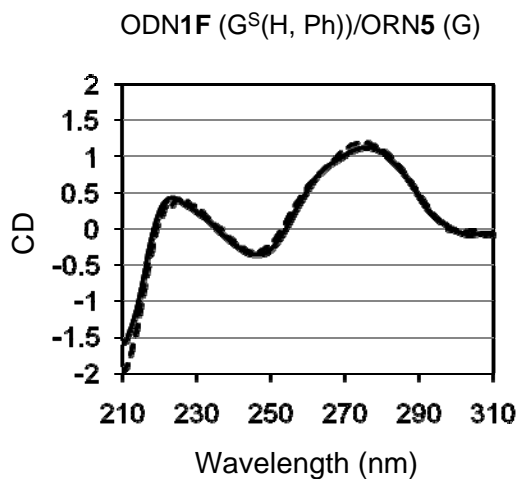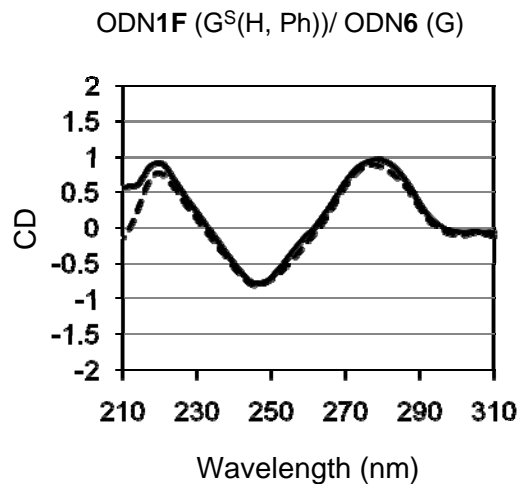

## UV melting curves

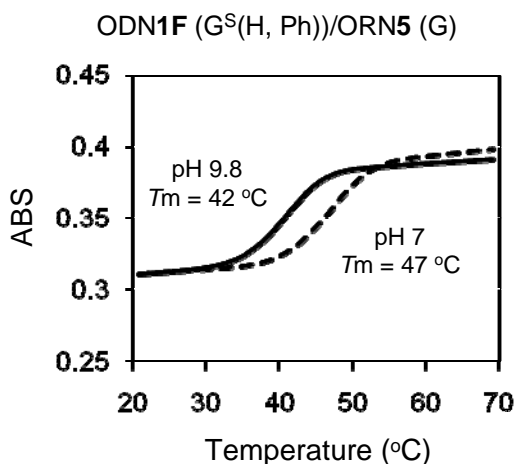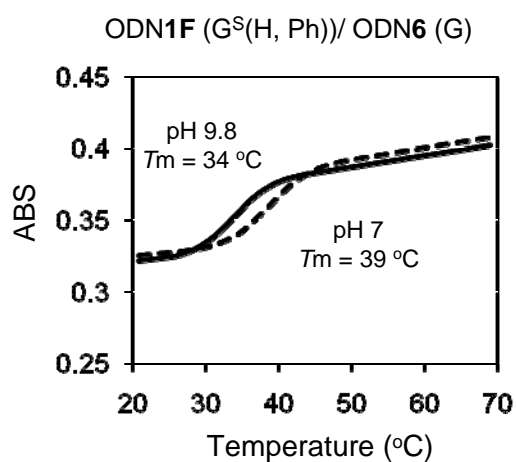

**Figure S1.** CD spectra and UV melting curves. CD spectra were measured using 2.5  $\mu\text{M}$  duplexes in 50 mM MES buffer (pH 7, broken line) or 50 mM carbonate buffer (pH 9.8, solid line) containing 100 mM NaCl. Melting curves were measured using 1.3  $\mu\text{M}$  duplexes in 50 mM MES buffer (pH 7) or 50 mM carbonate buffer (pH 9.8) containing 100 mM NaCl.

## pH dependency (DNA)

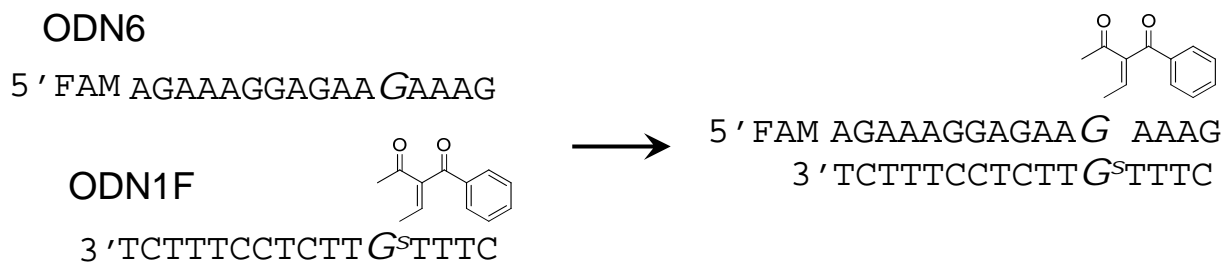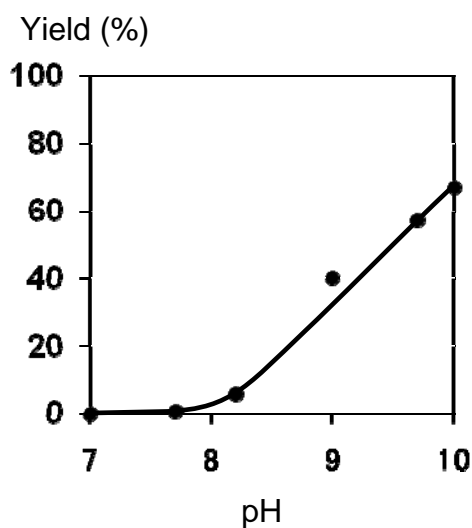

**Figure S2.** The pH dependency of the transfer reaction with DNA substrate. The transfer reactions were performed by using 1.5  $\mu\text{M}$  of S-functionalized ODN1F ( $G^{\text{S}}$ (Me, Ph)) and 1.0  $\mu\text{M}$  of the target ODN6 (G) in 50 mM phosphate or carbonate buffer (pH > 9) at 25°C for 1h, and followed by HPLC (Column: SHISEIDO C18, 4.6 x 250 mm; Solvent: A: 0.1 M TEAA Buffer, B:  $\text{CH}_3\text{CN}$ , B: 10% to 30% /20 min, linear gradient; Flow rate: 1.0 ml/min; monitored by fluorescence detector at 518 nm with emission at 494 nm).

## Base selectivity (DNA)

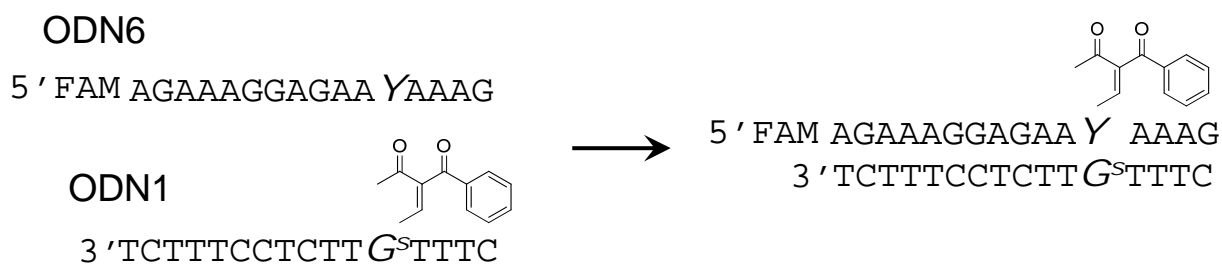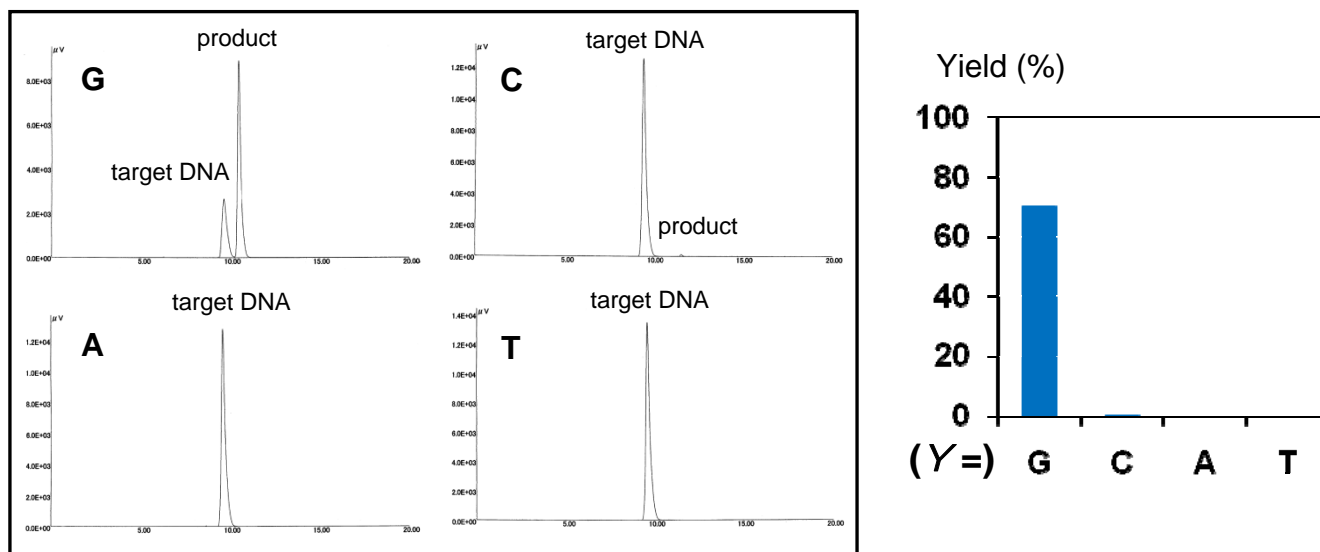

**Figure S3.** Selectivity to the guanine base in the DNA substrates. The transfer reactions were performed by using 1.5  $\mu$ M of S-functionalized ODN1F(G<sup>S</sup>(Me, Ph)) and 1.0  $\mu$ M of the target ODN6 (Y) in 50 mM carbonate buffer containing 100 mM NaCl at pH 10 for 2h, and followed by HPLC (Column: SHISEIDO C18, 4.6 x 250 mm; Solvent: A: 0.1 M TEAA Buffer, B: CH<sub>3</sub>CN, B: 10% to 30% /20 min, linear gradient; Flow rate: 1.0 ml/min; monitored by fluorescence detector at 518 nm with emission at 494 nm).

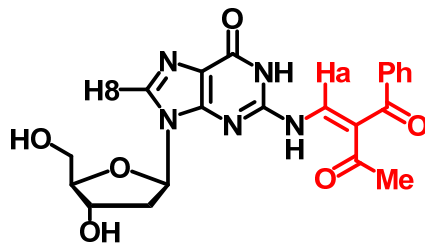

**Hydrolysate of the modified DNA**

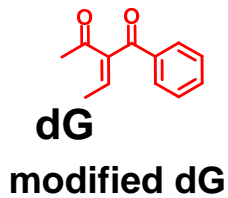

500 MHz, CD<sub>3</sub>OD

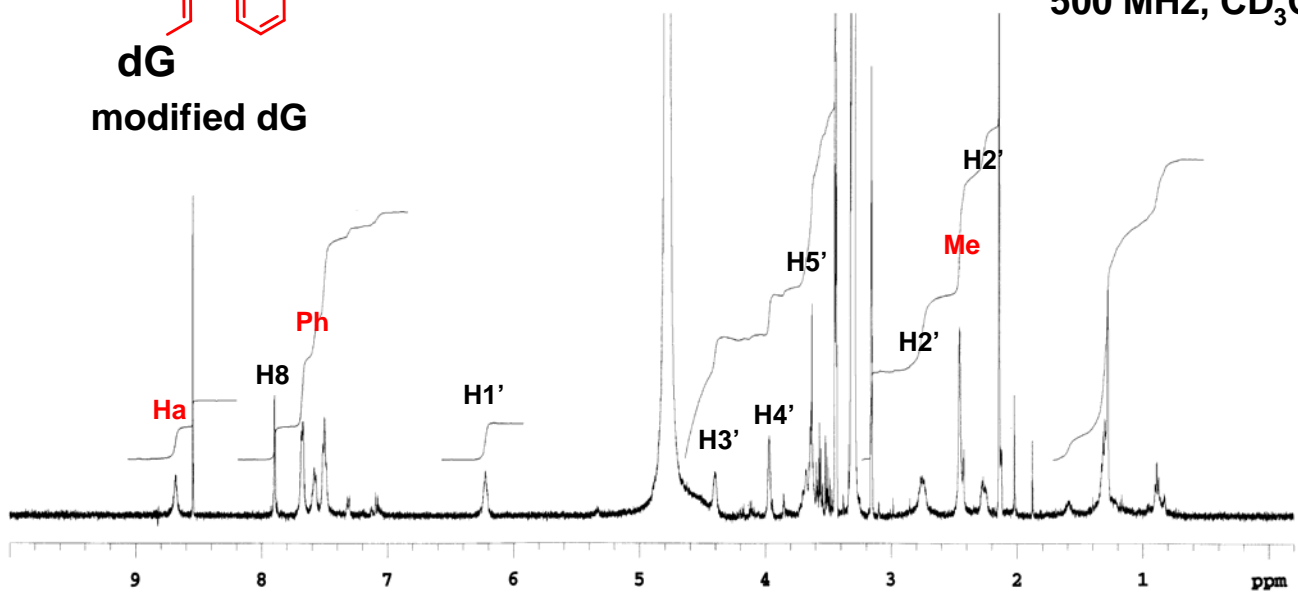

**Synthesized compound**

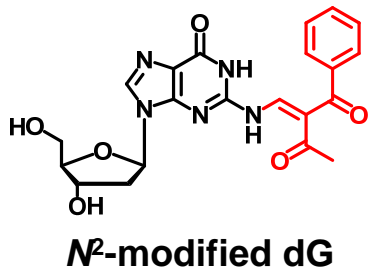

500 MHz, CD<sub>3</sub>OD

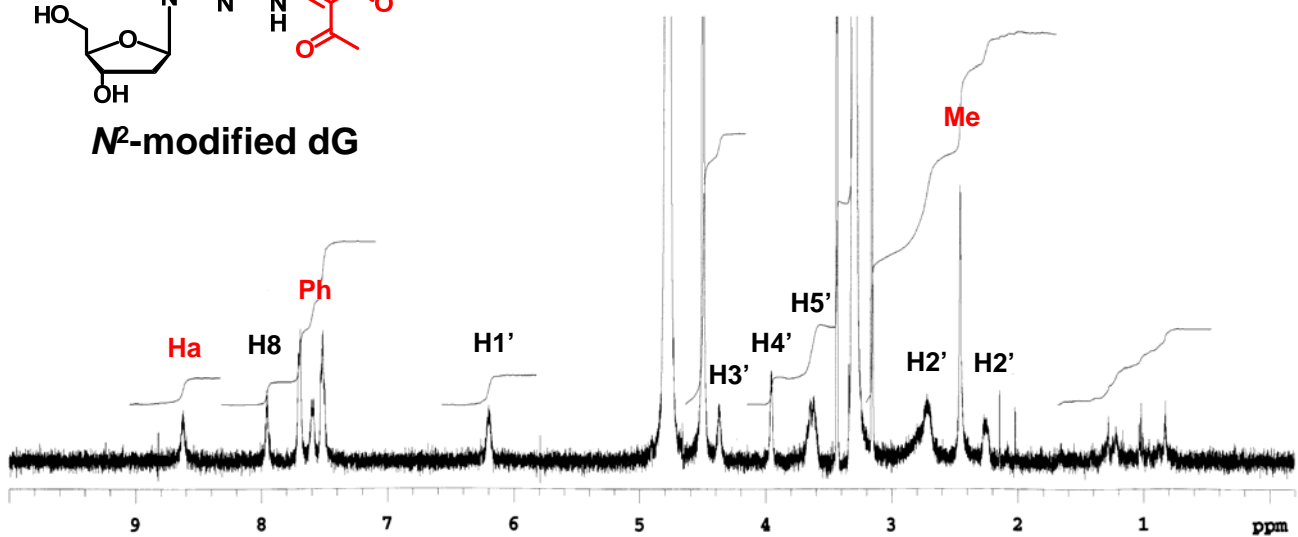

**Figure S4.** <sup>1</sup>H-NMR measurements

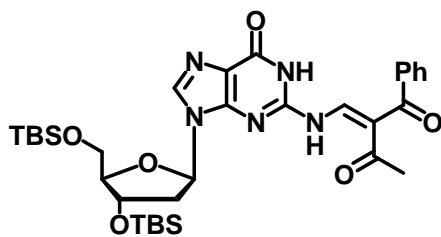

K01071-2,h1

Pulse Sequence: s2pu1  
 DATE Jan 16 2009  
 SOLVENT cdcl3  
 OBSERVE H1  
 FREQUENCY 399.873 MHz  
 SPECTRAL WIDTH 11999.4 Hz  
 ACQUISITION TIME 2.731 sec  
 RELAXATION DELAY 2.269 sec  
 PULSE WIDTH 6.0 usec  
 TEMPERATURE 30.0 deg. C.  
 NO. REPETITIONS 16  
 DOUBLE PRECISION ACQUISITION  
 DATA PROCESSING  
 RESOLUTION ENHANCEMENT -0.0 Hz  
 FT SIZE 65536  
 TOTAL ACQUISITION TIME 1 minutes

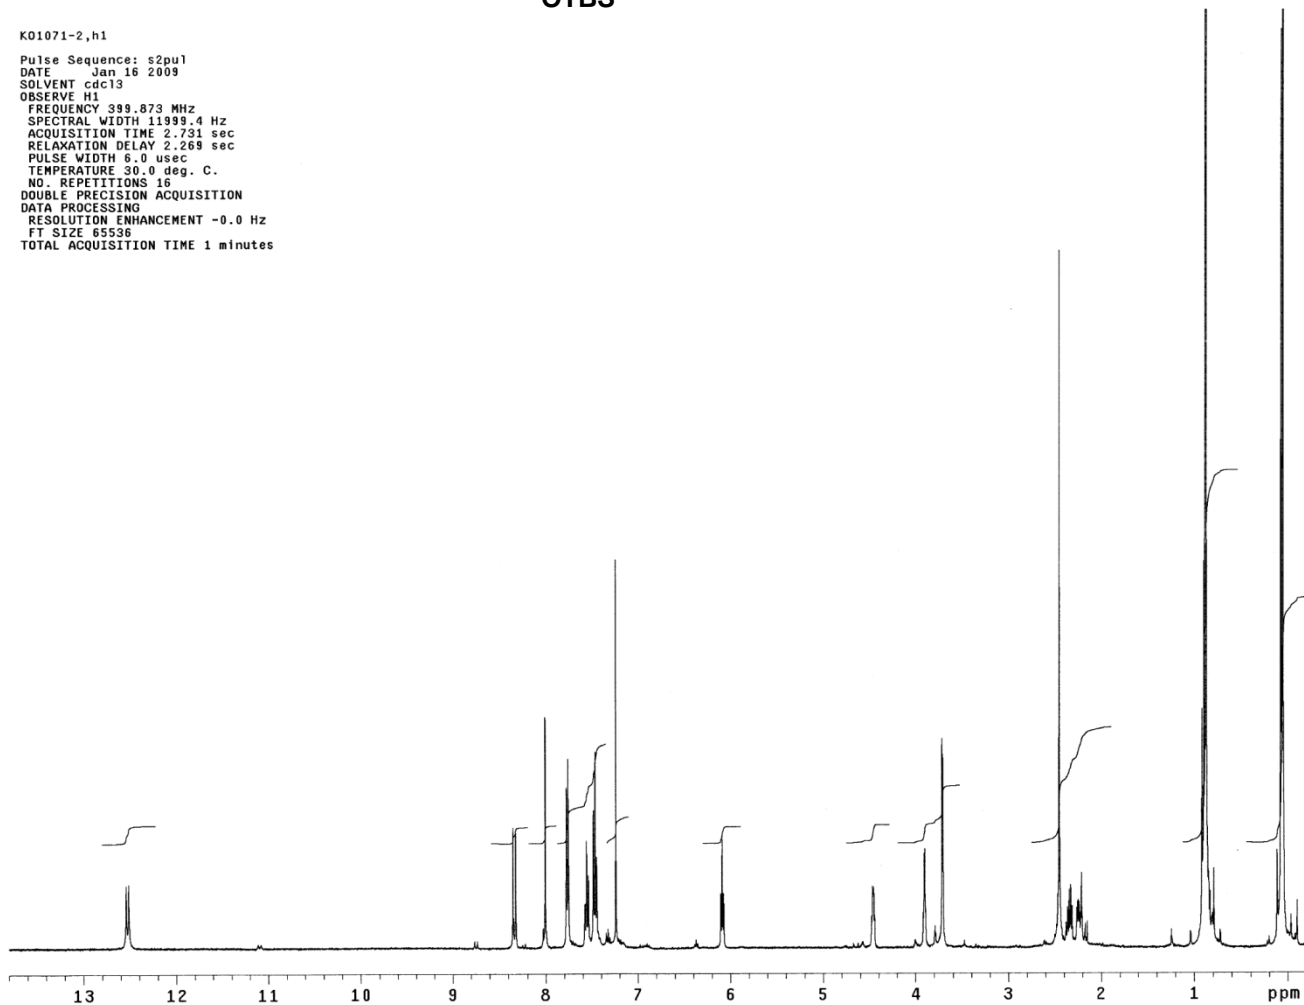

Table S1. UV Melting temperatures of the duplexes formed with.

| ODN                          | Complementary strand | Y =  | pH  | T <sub>m</sub> (°C) |
|------------------------------|----------------------|------|-----|---------------------|
| ODN1-G <sup>S</sup>          | ORN5                 | rG   | 9.8 | 39                  |
| ODN1F-G <sup>S</sup> (H, Ph) | ORN5                 | rG   | 9.8 | 42                  |
| ODN1F-G <sup>S</sup> (H, Ph) | ORN5 (FAM)           | rG   | 9.8 | 43                  |
| ODN1F-G <sup>S</sup> (H, Ph) | ORN5 (FAM)           | rC   | 9.8 | 42                  |
| ODN1F-G <sup>S</sup> (H, Ph) | ORN5 (FAM)           | rA   | 9.8 | 44                  |
| ODN1F-G <sup>S</sup> (H, Ph) | ORN5 (FAM)           | rU   | 9.8 | 43                  |
| ODN1F-G <sup>S</sup> (H, Ph) | ORN5                 | rG   | 7   | 47                  |
| ODN1-G <sup>S</sup> (H, Ph)  | ORN5 (FAM)           | rG   | 7   | 49                  |
| ODN1F-G <sup>S</sup> (H, Ph) | ORN5 (FAM)           | rC   | 7   | 49                  |
| ODN1F-G <sup>S</sup> (H, Ph) | ORN5 (FAM)           | rA   | 7   | 49                  |
| ODN1F-G <sup>S</sup> (H, Ph) | ORN5 (FAM)           | rU   | 7   | 48                  |
| ODN1F-G <sup>S</sup> (H, Ph) | ODN6 (FAM)           | dG   | 9.8 | 35                  |
| ODN1F-G <sup>S</sup> (H, Ph) | ODN6 (FAM)           | dC   | 9.8 | 37                  |
| ODN1F-G <sup>S</sup> (H, Ph) | ODN6 (FAM)           | dA   | 9.8 | 35                  |
| ODN1F-G <sup>S</sup> (H, Ph) | ODN6 (FAM)           | dT   | 9.8 | 35                  |
| ODN1F-G <sup>S</sup> (H, Ph) | ODN6                 | dG   | 9.8 | 34                  |
| ODN1F-G <sup>S</sup> (H, Ph) | ODN6                 | dHx  | 9.8 | 33                  |
| ODN1F-G <sup>S</sup> (H, Ph) | ODN6                 | d2AP | 9.8 | 34                  |
| ODN1F-G <sup>S</sup> (H, Ph) | ODN6                 | dG   | 7   | 39                  |
| ODN1F-G <sup>S</sup> (H, Ph) | ODN6                 | dHx  | 7   | 38                  |
| ODN1F-G <sup>S</sup> (H, Ph) | ODN6                 | d2AP | 7   | 39                  |
| ODN2F-G <sup>S</sup> (H, Ph) | ORN7 (FAM)           |      | 9.8 | 45                  |
| ODN2F-G <sup>S</sup> (H, Ph) | ORN8 (FAM)           |      | 9.8 | 45                  |
| ODN3F-G <sup>S</sup> (H, Ph) | ORN7 (FAM)           |      | 9.8 | 42                  |
| ODN3F-G <sup>S</sup> (H, Ph) | ORN9 (FAM)           |      | 9.8 | 45                  |
| ODN4F-G <sup>S</sup> (H, Ph) | ORN10 (FAM)          | rG   | 9.8 | 36                  |
| ODN4F-G <sup>S</sup> (H, Ph) | ORN10(FAM)           | rC   | 9.8 | 37                  |
| ODN4F-G <sup>S</sup> (H, Ph) | ORN10(FAM)           | rA   | 9.8 | 36                  |
| ODN4F-G <sup>S</sup> (H, Ph) | ORN10 (FAM)          | rU   | 9.8 | 36                  |

Table S2. MALDI-TOF.MS Data of all ODN and ORN compounds used in this study.

| DNA or RNA | 5' Label | X or Y                          | Calcd ([M-H] <sup>-</sup> ) | Found  |
|------------|----------|---------------------------------|-----------------------------|--------|
| ODN1       |          | X = G <sup>S</sup>              | 4767.8                      | 4766.5 |
| ODN1F      |          | X = G <sup>S</sup> (Me, Ph)     | 4939.7                      | 4941.5 |
| ODN1F      |          | X = G <sup>S</sup> (Me, Pyrene) | 5063.9                      | 5064.4 |
| ODN1 F     |          | X = G <sup>S</sup> (H, Ph)      | 4897.8                      | 4898.8 |
| ODN2       |          | X = G <sup>S</sup>              | 4742.7                      | 4742.8 |
| ODN2 F     |          | X = G <sup>S</sup> (Me, Ph)     | 4914.7                      | 4914.2 |
| ODN2 F     |          | X = G <sup>S</sup> (Me, Pyrene) | 5038.8                      | 5037.8 |
| ODN2F      |          | X = G <sup>S</sup> (H, Ph)      | 4872.7                      | 4872.9 |
| ODN3       |          | X = G <sup>S</sup>              | 4742.7                      | 4742.4 |
| ODN3F      |          | X = G <sup>S</sup> (Me, Ph)     | 4914.7                      | 4914.0 |
| ODN3F      |          | X = G <sup>S</sup> (Me, Pyrene) | 5038.8                      | 5038.4 |
| ODN3F      |          | X = G <sup>S</sup> (H, Ph)      | 4872.7                      | 4872.7 |
| ODN4       |          | X = G <sup>S</sup>              | 6719.1                      | 6719.1 |
| ODN4 F     |          | X = G <sup>S</sup> (Me, Ph)     | 6891.1                      | 6890.5 |
| ODN4 F     |          | X = G <sup>S</sup> (H, Ph)      | 6849.1                      | 6849.0 |
| ORN5       |          | Y = rG                          | 5297.8                      | 5297.8 |
| ORN5       | FAM      | Y = rG                          | 5835.9                      | 5835.9 |
| ORN5       | FAM      | Y = rC                          | 5795.9                      | 5795.1 |
| ORN5       | FAM      | Y = rA                          | 5819.9                      | 5819.5 |
| ORN5       | FAM      | Y = rU                          | 5796.9                      | 5796.5 |
| ORN5       |          | Y = rG(Me, Ph)                  | 5469.8                      | 5469.6 |
| ORN5       |          | Y = rG(Me, Pyrene)              | 5593.9                      | 5593.8 |
| ODN6       | FAM      | Y = dG                          | 5579.1                      | 5579.5 |
| ODN6       | FAM      | Y = dC                          | 5539.1                      | 5538.7 |
| ODN6       | FAM      | Y = dA                          | 5563.1                      | 5563.5 |
| ODN6       | FAM      | Y = dT                          | 5554.1                      | 5553.7 |
| ODN6       |          | Y = dG                          | 5041.9                      | 5091.6 |
| ODN6       |          | Y = dHx                         | 5026.9                      | 5026.7 |
| ODN6       |          | Y = d2AP                        | 5026.0                      | 5025.4 |
| ODN6       |          | Y = dG(Me, Ph)                  | 5214.0                      | 5213.6 |
| ODN6       |          | Y = d2AP(Me, Ph)                | 5198.0                      | 5198.3 |
| ORN7       | FAM      |                                 | 5851.9                      | 5851.3 |
| ORN8       | FAM      |                                 | 5811.9                      | 5811.3 |
| ORN9       | FAM      |                                 | 5811.9                      | 5811.2 |
| ORN10      | FAM      | Y = rG                          | 9145.1                      | 9145.4 |
| ORN10      | FAM      | Y = rC                          | 9105.1                      | 9105.9 |
| ORN10      | FAM      | Y = rA                          | 9129.1                      | 9129.0 |
| ORN10      | FAM      | Y = rU                          | 9106.1                      | 9106.3 |
